# Supplementary material
Source: publisher figshare collection journal article supplement (https://acs.figshare.com/ndownloader/files/20200944)
Supplement: Supplementary file 1 [file 20200944]

## ***Supporting Information***

### **Stability and Phase Transition of Metastable Black Arsenic under High Pressure**

Chaofeng Gao<sup>1, #</sup>, Ruiping Li<sup>1, #</sup>, Mianzeng Zhong<sup>3</sup>, Rong Wang<sup>1</sup>, Meng Wang<sup>1</sup>, Changqing

Lin<sup>1</sup>, Liping Huang<sup>1</sup>, Yingchun Cheng<sup>1\*</sup> and Wei Huang<sup>1, 2</sup>

<sup>1</sup>Key Laboratory of Flexible Electronics & Institute of Advanced Materials, Jiangsu National Synergetic Innovation Center for Advanced Materials, Nanjing Tech University, 30 South Puzhu Road, Nanjing 211816, China

<sup>2</sup>Shaanxi Institute of Flexible Electronics (SIFE), Northwestern Polytechnical University (NPU), 127 West Youyi Road, Xi'an, 710072, China

<sup>3</sup>Hunan Key Laboratory of Super-Microstructure and Ultrafast Process, School of Physics and Electronics, Central South University, Changsha 410083, China

\*To whom correspondence should be addressed. E-mail: [iamyccheng@njtech.edu.cn](mailto:iamyccheng@njtech.edu.cn)

<sup>#</sup>Chaofeng Gao and Ruiping Li contributed equally.

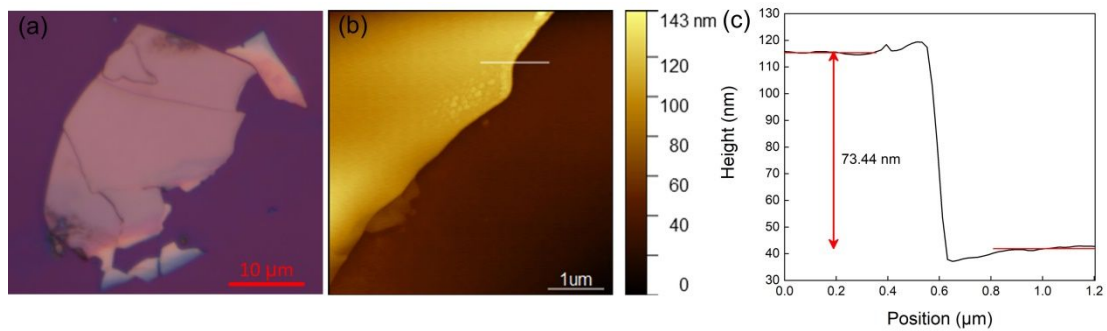

Figure S1. (a) Optical and (b) AFM images of bAs on SiO<sub>2</sub>/Si substrate. (c) A height profile of bAs measured along the white solid line in (b).

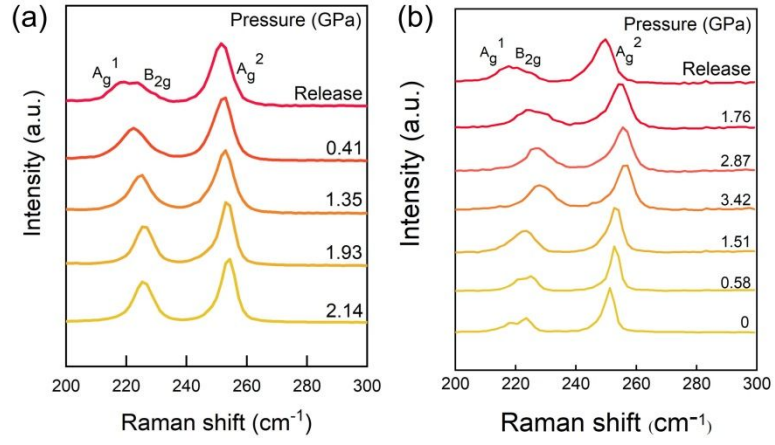

Figure S2. Pressure-dependence of the Raman shift. The pressure is firstly loaded to 2.14 (a) and 3.42 GPa (b), and then slowly released to ambient, respectively.

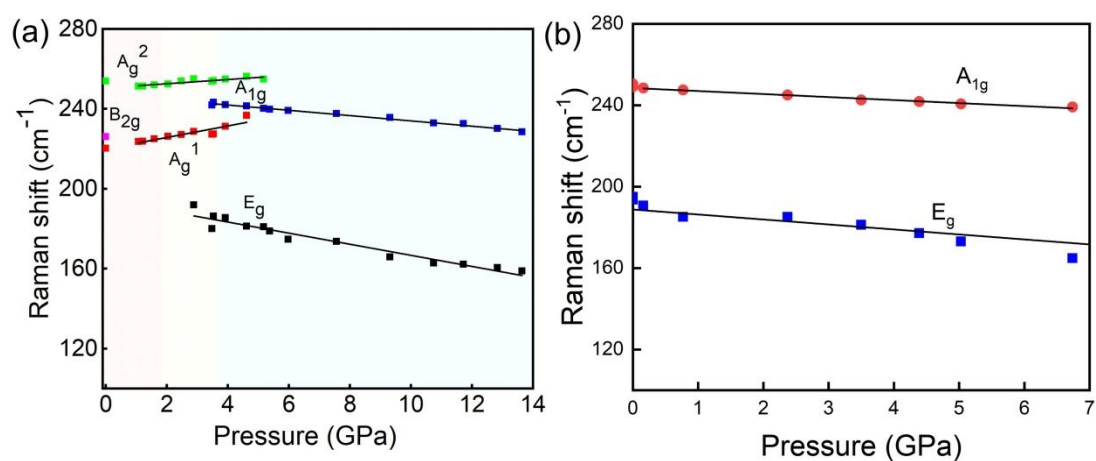

Figure S3. (a) Linear fitting pressure dependence of the Raman shifts for the  $A_g^1$  and  $A_g^2$  of bAs and the  $E_g$  and  $A_{1g}$  of gAs shown in figure 3a. (b) The linear fitting pressure dependence for the Raman shifts of  $E_g$  and  $A_{1g}$  of figure 3c.

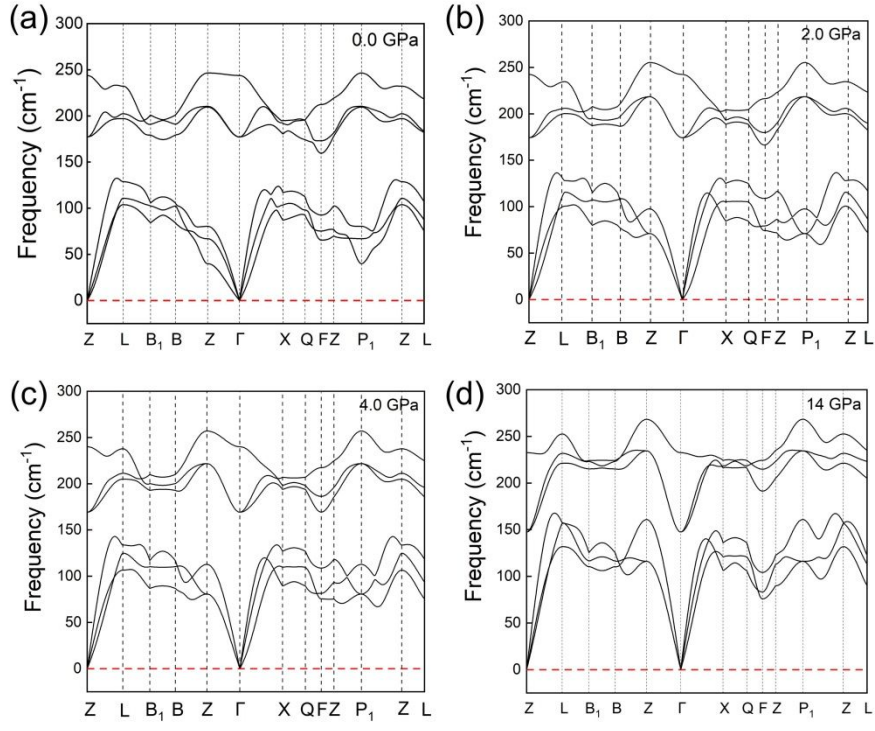

Figure S4. The calculated phonon dispersions for gAs at (a) 0, (b) 2, (c) 4, and (d) 14 GPa.

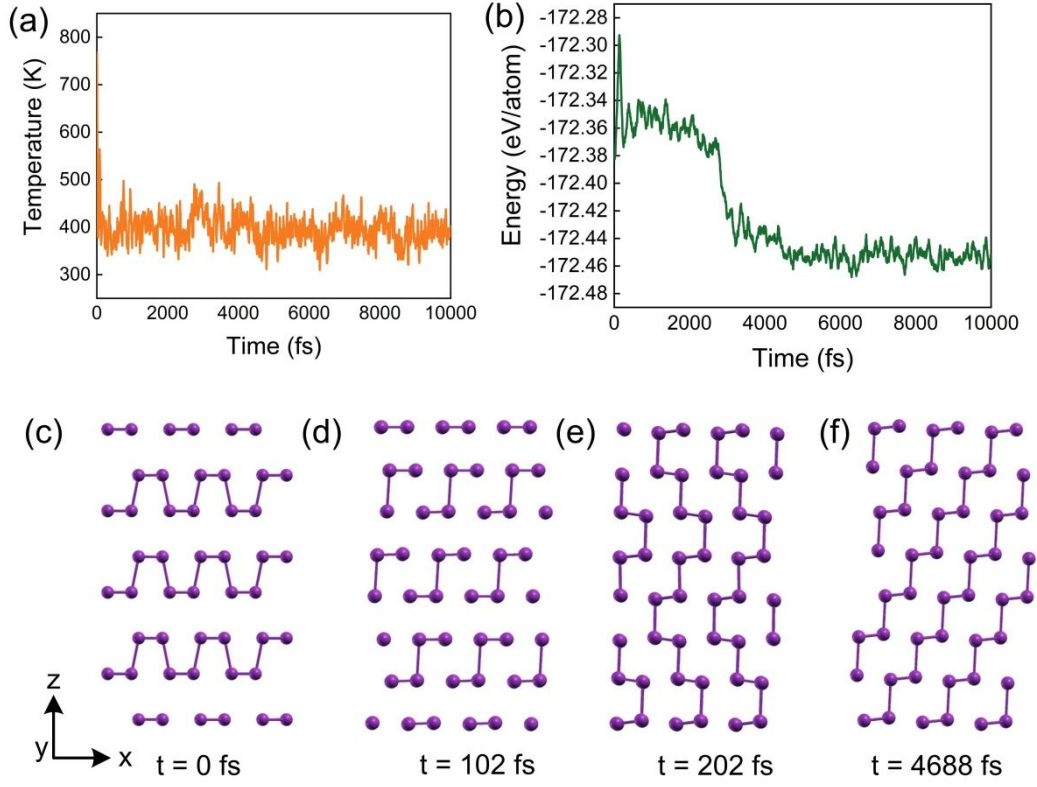

Figure S5. Mechanism and process for the phase transition from bAs to gAs at 5 GPa and 400 K in the *NPT* ensemble. (a) Temperature and (b) potential-energy change in the MD simulations. (c) The initial structure of bAs with a  $3 \times 3 \times 2$  supercell ( $t = 0$  fs). (d) Structure of the intermediate state for the phase transition process at 102 fs showing intralayer As-As bonds breaking. (e) Structure of the intermediate phase transition state at 202 fs where the interlayer As-As bonds formed and (f) crystal structure after transformation to the gAs phase at 4688 fs.

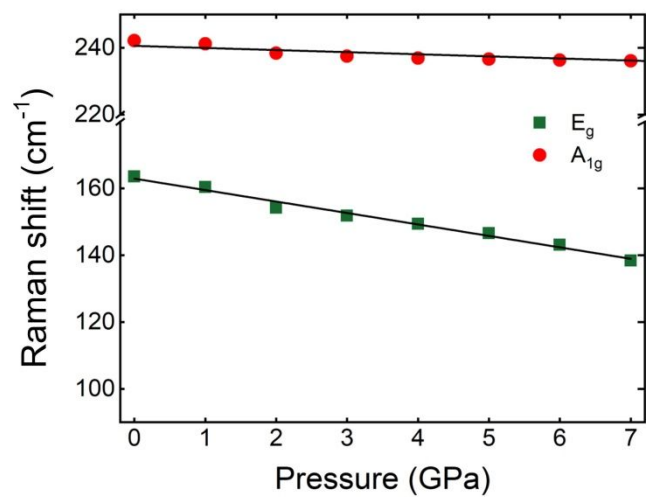

Figure S6. Calculated pressure dependence of the Raman shifts for gAs up to 7 GPa.

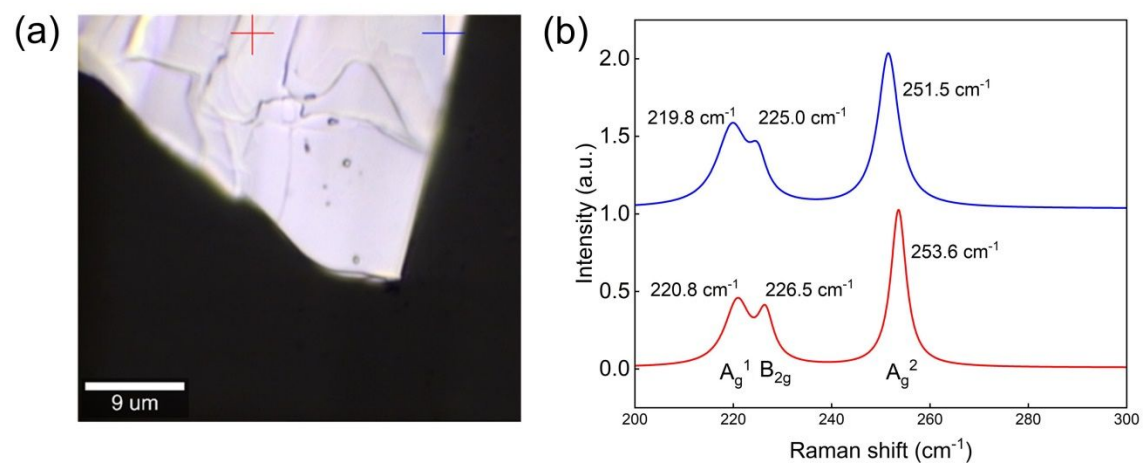

Figure S7. (a) Optical micrograph of the thick bAs sample. (b) Raman spectra for two different points on the sample.
